# Supplementary material for: Phosphoproteomic Alterations of Ionotropic Glutamate Receptors in the Hippocampus of the Ts65Dn Mouse Model of Down Syndrome
Source: Front Mol Neurosci. 2018 Jul 25;11:226. doi: 10.3389/fnmol.2018.00226 (PMC6095006; doi:10.3389/fnmol.2018.00226)
Supplement: Supplementary file 5 [file Data_Sheet_3.XLSX]

## Sheet: P35436 (GluN2A) Phosphopeptides
		IDENTIFIED GluN2A PHOSPHOSITES
GluN2A
	Confidence	Annotated Sequence	Modifications	Modifications in Master Proteins	Qvality PEP	Qvality q-value	# Protein Groups	# Proteins	# PSMs	Master Protein Accessions	Positions in Master Proteins	# Missed Cleavages	Theo. MH+ [Da]	Found in Post EU	Found in Post TS	Found in Extra EU	Found in Extra TS	ptmRS: Best Site Probabilities	Areas Post EU	Areas Post TS	Areas Extra EU	Areas Extra TS	Ions Score Mascot	Confidence Mascot	Percolator q-Value Mascot	Percolator PEP Mascot		Ratio Post TS/EU	Phosphorylations in both experiments represented in Figure 6
Replicate 1	High	[R].GSLIVDMVSDK.[G]	1×Oxidation [M7(100)]; 1×PhosphoJoin [S2(100)]		0.00163021	0	1	1	2	P35436	P35436 [928-938]	0	1259.56	High	Not Found	Not Found	Not Found	S2(Phosp): 100; M7(Oxidation): 100	11000000				32.39	High	0	0.00023	S29
	High	[R].GSLIVDMVSDK.[G]	1×PhosphoJoin [S2(100)]		0.000770966	0	1	1	5	P35436	P35436 [928-938]	0	1243.56	High	Medium	High	Not Found	S2(Phosp): 100	4800000	300000000	3200000		37.94	High	0	0.0001049	S929	62.5
	High	[K].SPDFNLTGSQSNMLK.[L]	1×Oxidation [M13(100)]; 1×PhosphoJoin [S1(100)]		1.03187e-08	0	1	1	11	P35436	P35436 [882-896]	0	1734.74	High	High	Medium	Not Found	S9(Phosp): 91,67; M13(Oxidation): 100	1800000	44000000	640000		72.84	High	0	7.519e-10	S890	24.4444
	High	[K].SPDFNLTGSQSNMLK.[L]	1×PhosphoJoin [S/T]		9.96359e-09	0	1	1	9	P35436	P35436 [882-896]	0	1718.75	High	High	High	Not Found	S9(Phosp): 85	3800000		900000		78.35	High	0	7.204e-10	S890
	High	[R].QDSLNQNPVSQR.[D]	1×PhosphoJoin [S3(100)]		3.83973e-06	0	1	1	6	P35436	P35436 [1023-1034]	0	1465.64	Medium	High	Not Found	Not Found	S3(Phosp): 100		130000000			66.67	High	0	3.876e-07	S1025
	High	[K].GSPHSEGSDRYR.[Q]	2×PhosphoJoin [S2; S5; S]		0.0109416	0.000836013	1	1	2	P35436	P35436 [1197-1208]	1	1507.54	Medium	High	Not Found	Not Found	S2(Phosp): 100; S5(Phosp): 98,67	1200000	2100000			34.88	High	0.0003438	0.001618	S1198	1.75
	High	[K].SPDFNLTGSQSNMLK.[L]	2×PhosphoJoin [S1; S9]; 1×Oxidation [M13(100)]		0.0142415	0.00112539	1	1	2	P35436	P35436 [882-896]	0	1814.71	High	High	Not Found	Not Found	S1(Phosp): 100; T7(Phosp): 86,17; M13(Oxidation): 100	500000	5600000			29.43	High	0.0004151	0.002114	S882	11.2
	High	[K].IYTIDGEK.[E]	1×PhosphoJoin [T/Y]		0.0132877	0.00112539	1	1	5	P35436	P35436 [1117-1124]	0	1018.45	Not Found	High	Not Found	Not Found	Y2(Phosp): 99,58		5800000			22.13	High	0.0005743	0.00446	Y1118
	High	[K].GNLIYSDNR.[S]	1×PhosphoJoin [Y/S]		0.0263354	0.00157358	1	1	3	P35436	P35436 [939-947]	0	1131.48	Not Found	Medium	Not Found	Not Found	Y5(Phosp): 50; S6(Phosp): 50					18.21	High	0.003889	0.03191	Y943-S944
	High	[R].CPSDPYK.[H]	1×PhosphoJoin [S3(100)]; 1×Carbamidomethyl [C1]		0.0699264	0.00570549	1	1	5	P35436	P35436 [1382-1388]	0	946.338	High	High	Not Found	Not Found	S3(Phosp): 100	1500000				22.47	High	0.00239	0.01871	S1384	0
	Medium	[R].YLPEEVAHSDISETSSR.[A]	2×PhosphoJoin [S9; S]		0.200288	0.0176549	1	1	2	P35436	P35436 [1051-1067]	0	2079.83	Not Found	High	Not Found	Not Found	S9(Phosp): 97,18; S12(Phosp): 94,66		460000			19.85	High	0.004743	0.04224	S1059-S1062
	Medium	[R].YLPEEVAHSDISETSSR.[A]	1×PhosphoJoin [S16; S/T]		0.319335	0.033769	1	1	4	P35436	P35436 [1051-1067]	0	1999.86	Not Found	Not Found	Not Found	Not Found	S9(Phosp): 29,89; S12(Phosp): 29,89; S16(Phosp): 29,89					4.64	High	0.008678	0.08227	S1059-S1062-S1066
	Confidence	Annotated Sequence	Modifications	Modifications in Master Proteins	Qvality PEP	Qvality q-value	# Protein Groups	# Proteins	# PSMs	Master Protein Accessions	Positions in Master Proteins	# Missed Cleavages	Theo. MH+ [Da]	Found in Post EU	Found in Post TS	Found in Extra EU	Found in Extra TS	ptmRS: Best Site Probabilities	Areas Post EU	Areas Post TS	Areas Extra EU	Areas Extra TS	Ions Score Mascot	Confidence Mascot	Percolator q-Value Mascot	Percolator PEP Mascot		Ratio Post TS/EU	Phosphorylations in both experiments represented in Figure 6
Replicate 2	High	[K].SMESLRQDSLNQNPVSQR.[D]	1×PhosphoJoin [S9(100)]		0.000540541	0.000219061	1	1	2	P35436	P35436 [1017-1034]	1	2168.98	Not Found	High	Not Found	Not Found	S9(Phosp): 99.97		250000000			39.15	High	0.0001466	0.0003865	S1026
	High	[K].SMESLRQDSLNQNPVSQR.[D]	1×Oxidation [M2(100)]; 1×PhosphoJoin [S9(99.9)]		0.000628059	0.000374323	1	1	1	P35436	P35436 [1017-1034]	1	2184.97	Not Found	High	Not Found	Not Found	M2(Oxidation): 100; S9(Phosp): 99.87		45000000			20.36	High	0.0001193	0.0002006	S1026
	High	[K].SMESLRQDSLNQNPVSQRDEK.[T]	1×PhosphoJoin [S4(98.4)]		0.02073	0.00158714	1	1	1	P35436	P35436 [1017-1037]	2	2541.14	Not Found	High	Not Found	Not Found	S4(Phosp): 98.43		30000000			16.61	High	0.0006692	0.007675	S1020
	High	[R].QDSLNQNPVSQR.[D]	1×PhosphoJoin [S3(100)]		3.36966e-05	0	1	1	3	P35436	P35436 [1023-1034]	0	1465.64	High	High	Not Found	Not Found	S3(Phosp): 100	140000000	47000000			70.43	High	0	9.057e-06	S1025	0.335714
	High	[R].YLPEEVAHSDISETSSR.[A]	1×PhosphoJoin [S9(99.4)]		0.000317778	0	1	1	4	P35436	P35436 [1051-1067]	0	1999.86	Not Found	High	Not Found	Not Found	S9(Phosp): 99.39		100000000			35.59	High	0	9.798e-05	S1059
	High	[R].YLPEEVAHSDISETSSR.[A]	2×PhosphoJoin [S9(99.9); S12(99.2)]		0.000406474	0.000219061	1	1	9	P35436	P35436 [1051-1067]	0	2079.83	High	High	Not Found	Not Found	S9(Phosp): 97.95; S12(Phosp): 98.13		210000000			43.21	High	7.154e-05	0.0001277	S1059-S1062
	High	[R].YLPEEVAHSDISETSSR.[A]	3×PhosphoJoin [S9(100); S15(99.3); S16(100)]		0.00249047	0.000446946	1	1	7	P35436	P35436 [1051-1067]	0	2159.8	High	Medium	Not Found	Not Found	S9(Phosp): 88.74; S12(Phosp): 88.78; T14(Phosp): 89.94	9400000				30.3	High	0.007382	0.08002	S1059-S1062-T1064	0
	High	[R].YLPEEVAHSDISETSSRATCHREPDNNK.[N]	1×Carbamidomethyl [C20]; 4×PhosphoJoin [S9(95.2); S16(95.5); T/S/Y]		0.0672552	0.00617443	1	1	1	P35436	P35436 [1051-1078]	2	3562.34	Not Found	High	Not Found	Not Found	S9(Phosp): 95.22; S12(Phosp): 69.6; T14(Phosp): 69.62; S15(Phosp): 69.62; S16(Phosp): 95.54		31000000			9.99	High	0.002529	0.02653	S1059-S1062-T1064-S1065
	High	[K].IYTIDGEK.[E]	1×PhosphoJoin [Y2(99.7)]		0.0061415	0.000521533	1	1	2	P35436	P35436 [1117-1124]	0	1018.45	High	High	Not Found	Not Found	Y2(Phosp): 99.71	33000000				30.63	High	0.0002432	0.002157	Y1118	0
	High	[K].GSPHSEGSDRYR.[Q]	2×PhosphoJoin [S2(99.1); S5(99.1)]		0.00106696	0.000446946	1	1	3	P35436	P35436 [1197-1208]	1	1507.54	High	High	Not Found	Not Found	S2(Phosp): 91.31; S5(Phosp): 91.31	19000000	240000000			23.8	High	0.0001466	0.0003487	S1198	12.6316
	Medium	[K].GSPHSEGSDRYR.[Q]	3×PhosphoJoin [S2(100); S5(99.6); S8(98)]		0.20087	0.0170781	1	1	2	P35436	P35436 [1197-1208]	1	1587.5	Medium	High	Not Found	Not Found	S2(Phosp): 99.99; S5(Phosp): 99.63; S8(Phosp): 97.97	55000000				3.76	High	0.007537	0.08311	S1198-S1201-S1204	0
	High	[R].CPSDPYK.[H]	1×Carbamidomethyl [C1]; 1×PhosphoJoin [S3(100)]		0.00501663	0.000521533	1	1	4	P35436	P35436 [1382-1388]	0	946.338	High	High	Not Found	Not Found	S3(Phosp): 100	8600000				36.33	High	0.0002432	0.002237	S1384	0
	High	[K].HSLPSQAVNDSYLR.[S]	1×PhosphoJoin [S/Y]		0.000958168	0.000446946	1	1	1	P35436	P35436 [1389-1402]	0	1666.76	Not Found	High	Not Found	Not Found	S2(Phosp): 50; S5(Phosp): 50		1900000			18.87	High	0.0001466	0.0003114	S1390-S1393
	High	[R].STASYCSRDSR.[G]	1×Carbamidomethyl [C6]; 1×PhosphoJoin [S10(99.3)]		0.0123502	0.000768869	1	1	2	P35436	P35436 [1407-1417]	1	1369.52	Not Found	High	Not Found	Not Found	S10(Phosp): 99.94		12000000			25.83	High	0.008304	0.09241	S1416
	Medium	[K].NNMYSTPR.[V]	1×PhosphoJoin [Y4(99.6)]		0.132184	0.0113558	1	1	2	P35436	P35436 [1436-1443]	0	1062.41	Medium	High	Not Found	Not Found	Y4(Phosp): 99.58	2200000	3700000			8.68	High	0.00488	0.05454	Y1439	1.68182
	Medium	[K].KMPSIESDV.[-]	1×PhosphoJoin [S4(100)]		0.33927	0.0295628	1	1	1	P35436	P35436 [1456-1464]	1	1085.46	Not Found	Medium	Not Found	Not Found	S4(Phosp): 99.95		180000000			36.51	Medium	0.01269	0.1429	S1459
	High	[K].KSPDFNLTGSQSNMLK.[L]	2×PhosphoJoin [S2(100); T/S]		0.000400806	0.000219061	1	1	2	P35436	P35436 [881-896]	1	1926.81	Not Found	High	Not Found	Not Found	S2(Phosp): 100; T8(Phosp): 49.9; S10(Phosp): 49.9		15000000			62.93	High	0.0001193	0.0001853	S882-T890-S892
	High	[K].SPDFNLTGSQSNMLK.[L]	1×PhosphoJoin [S1(100)]		3.25288e-06	0	1	1	2	P35436	P35436 [882-896]	0	1718.75	Not Found	High	Not Found	Not Found	S1(Phosp): 100		190000000			82.28	High	0	1.513e-06	S882
	High	[K].SPDFNLTGSQSNMLK.[L]	2×PhosphoJoin [S1(100); S9(90.6)]		3.4512e-05	0	1	1	2	P35436	P35436 [882-896]	0	1798.71	High	High	Not Found	Not Found	S1(Phosp): 100; T7(Phosp): 49.72; S9(Phosp): 49.72	3300000	200000000			64.78	High	0	6.653e-05	S882-T888-S890	60.6061
	High	[K].SPDFNLTGSQSNMLK.[L]	1×Oxidation [M13(100)]; 2×PhosphoJoin [S1(100); T7(86.9)]		0.00113524	0.000446946	1	1	1	P35436	P35436 [882-896]	0	1814.71	High	Not Found	Not Found	Not Found	S1(Phosp): 99.99; T7(Phosp): 86.91; M13(Oxidation): 100	610000				29.2	High	0.0001466	0.0003722	S882-T888	0
	High	[R].GSLIVDMVSDK.[G]	1×PhosphoJoin [S2(100)]		0.000434715	0.000219061	1	1	6	P35436	P35436 [928-938]	0	1243.56	High	High	Not Found	Not Found	S2(Phosp): 100	59000000	120000000			50.19	High	7.154e-05	0.0001368	S929	2.0339
	High	[R].GSLIVDMVSDK.[G]	1×Oxidation [M7(100)]; 1×PhosphoJoin [S2(100)]		0.000688857	0.000374323	1	1	1	P35436	P35436 [928-938]	0	1259.56	High	Not Found	Not Found	Not Found	S2(Phosp): 100; M7(Oxidation): 100	12000000				33.29	High	0.0001193	0.0002205	S929	0
	Medium	[R].GSLIVDMVSDK.[G]	2×PhosphoJoin [S2(100); S9(100)]		0.185828	0.0161998	1	1	1	P35436	P35436 [928-938]	0	1323.53	High	Not Found	Not Found	Not Found	S2(Phosp): 100; S9(Phosp): 100	800000				19.22	High	0.00709	0.0768	S929-S936	0
	Medium	[K].GNLIYSDNR.[S]	1×PhosphoJoin [Y/S]		0.403013	0.035083	1	1	3	P35436	P35436 [939-947]	0	1131.48	Medium	Medium	Not Found	Not Found	Y5(Phosp): 50; S6(Phosp): 50	14000000	9600000			11.34	Medium	0.02945	0.3699	Y943-S944	0.685714
	Medium	[K].GNLIYSDNRSFQGK.[D]	1×PhosphoJoin [S/Y]		0.122901	0.0106026	1	1	2	P35436	P35436 [939-952]	1	1678.76	Not Found	High	Not Found	Not Found	S10(Phosp): 87.29		28000000			22.18	High	0.004577	0.05055	S948

## Sheet: Q01097 (GluN2B) Phosphopeptides
																					IDENTIFIED GluN2B PHOSPHOSITES
GluN2B
	Confidence	Annotated Sequence	Modifications	Modifications in Master Proteins	Qvality PEP	Qvality q-value	# Protein Groups	# Proteins	# PSMs	Master Protein Accessions	Positions in Master Proteins	# Missed Cleavages	Theo. MH+ [Da]	Found in Post EU	Found in Post TS	Found in Extra EU	Found in Extra TS	ptmRS: Best Site Probabilities	Areas Post EU	Areas Post TS	Areas Extra EU	Areas Extra TS	Ions Score Mascot	Confidence Mascot	Percolator q-Value Mascot	Percolator PEP Mascot		Ratio Post TS/EU	Phosphorylations in both experiments represented in Figure 6
Replicate 1	High	[K].HSQLSDLYGK.[F]	1×PhosphoJoin [Y8(100)]		0.000188682	0	1	1	3	Q01097	Q01097 [1032-1041]	0	1227.54	Not Found	High	Not Found	Not Found	Y8(Phosp): 100					38.9	High	0	2.37e-05	Y1039
	High	[R].QSVMNSPTATMNNTHSNILR.[L]	1×PhosphoJoin [S/T]; 2×Oxidation [M4(100); M11(100)]		5.5936e-07	0	1	1	9	Q01097	Q01097 [881-900]	0	2328.01	High	High	Not Found	Not Found	M4(Oxidation): 100; S6(Phosp): 88,63; M11(Oxidation): 100		3600000			58.8	High	0	5.102e-08	S886
	High	[R].QSVMNSPTATMNNTHSNILR.[L]	1×PhosphoJoin [S/T]; 1×Oxidation [M4(100)]		4.61075e-09	0	1	1	17	Q01097	Q01097 [881-900]	0	2312.02	High	High	Not Found	Not Found	S2(Phosp): 87,03; M4(Oxidation): 98,4		1800000			61.65	High	0	3.212e-10	S882
	High	[R].QSVMNSPTATMNNTHSNILR.[L]	1×PhosphoJoin [S/T]		5.62139e-08	0	1	1	8	Q01097	Q01097 [881-900]	0	2296.02	High	High	Not Found	Not Found	S6(Phosp): 99,99	910000	7900000			53.11	High	0	4.498e-09	S886	8.68132
	High	[R].SFTHSDCK.[S]	1×PhosphoJoin [S5; S/T]; 1×Carbamidomethyl [C7]		0.00159636	0	1	1	12	Q01097	Q01097 [940-947]	0	1061.38	Not Found	High	Medium	High	S1(Phosp): 99,6		360000000	2100000	8100000	52.45	High	0	0.0002248	S940
	High	[K].AGNLYDISEDNSLQELDQPAAPVAVSSNASTTK.[Y]	1×PhosphoJoin [S/Y]		1.49271e-09	0	1	1	5	Q01097	Q01097 [1248-1280]	0	3485.6	High	High	Not Found	Not Found	S12(Phosp): 88,71	5600000	42000000			85.83	High	0	9.754e-11	S1259
	High	[R].SDVSDISTHTVTYGNIEGNAAK.[R]	2×PhosphoJoin [S/T]		0.000221662	0	1	1	14	Q01097	Q01097 [1058-1079]	0	2439.01	High	High	Not Found	Not Found	S1(Phosp): 99,47; S4(Phosp): 96,58	790000	7500000			37.56	High	0	3.052e-05	S1058
	High	[R].SDVSDISTHTVTYGNIEGNAAK.[R]	1×PhosphoJoin [S/T]		5.94014e-05	0	1	1	12	Q01097	Q01097 [1058-1079]	0	2359.04	High	High	Not Found	Not Found	S4(Phosp): 91,52	1900000	5600000			44.18	High	0	6.988e-06	S1061	2.94737
	High	[R].QHSYDTFVDLQK.[E]	1×PhosphoJoin [S3]		0.00012926	0	1	1	4	Q01097	Q01097 [1301-1312]	0	1560.67	High	High	Not Found	Not Found	S3(Phosp): 92,93	1000000	8200000			36.23	High	0	1.597e-05	S1303	8.2
	High	[K].YPQSPTNSK.[A]	1×PhosphoJoin [S4]		0.000713822	0	1	1	9	Q01097	Q01097 [1281-1289]	0	1101.46	High	High	Not Found	Medium	S4(Phosp): 99,65	340000000	600000000		14000000	41.06	High	0.0003438	0.001346	S1284	1.76471
	High	[K].RDSVSGGGPCTNR.[S]	1×PhosphoJoin [S3(100)]; 1×Carbamidomethyl [C10]		0.000862343	0	1	1	10	Q01097	Q01097 [1164-1176]	1	1442.58	High	High	Not Found	Not Found	S3(Phosp): 100	24000000	60000000			42.05	High	0	0.0001178	S1166	2.5
	High	[R].QSVMNSPTATMNNTHSNILR.[L]	2×PhosphoJoin [S2; S6]; 1×Oxidation [M4(100)]		0.00857969	0.000836013	1	1	1	Q01097	Q01097 [881-900]	0	2391.98	Not Found	High	Not Found	Not Found	S2(Phosp): 100; M4(Oxidation): 100; T8(Phosp): 87,35		470000			12.31	High	0.0003438	0.001269	T888
	Confidence	Annotated Sequence	Modifications	Modifications in Master Proteins	Qvality PEP	Qvality q-value	# Protein Groups	# Proteins	# PSMs	Master Protein Accessions	Positions in Master Proteins	# Missed Cleavages	Theo. MH+ [Da]	Found in Post EU	Found in Post TS	Found in Extra EU	Found in Extra TS	ptmRS: Best Site Probabilities	Areas Post EU	Areas Post TS	Areas Extra EU	Areas Extra TS	Ions Score Mascot	Confidence Mascot	Percolator q-Value Mascot	Percolator PEP Mascot		Ratio Post TS/EU	Phosphorylations in both experiments represented in Figure 6
Replicate 2	Medium	[K].HSQLSDLYGK.[F]	2×PhosphoJoin [S2(100); S5(99.8)]		0.181057	0.0155399	1	1	1	Q01097	Q01097 [1032-1041]	0	1307.51	High	Not Found	Not Found	Not Found	S2(Phosp): 99.99; S5(Phosp): 99.77	6800000				10.61	High	0.006783	0.07501	S1033-S1036
	High	[K].SDRYSGHDDLIR.[S]	1×PhosphoJoin [S/Y]		0.111995	0.00963449	1	1	2	Q01097	Q01097 [1046-1057]	1	1513.64	Not Found	High	Not Found	Not Found	S1(Phosp): 33.33; Y4(Phosp): 33.33; S5(Phosp): 33.33		49000000			3.07	High	0.004086	0.04581	S1046-Y1049-S1050
	High	[R].SDVSDISTHTVTYGNIEGNAAK.[R]	3×PhosphoJoin [T8(97.2); T10(97.9); T/Y/S]		0.000302191	0	1	1	3	Q01097	Q01097 [1058-1079]	0	2518.98	Not Found	High	Not Found	Not Found	S7(Phosp): 79.66; T8(Phosp): 93.84; T10(Phosp): 84.52		1200000			33.81	High	0.0001466	0.0006961	S1064-T1065-T1067
	High	[R].SDVSDISTHTVTYGNIEGNAAK.[R]	2×PhosphoJoin [S4(99.3); S/T/Y]		2.51101e-05	0	1	1	5	Q01097	Q01097 [1058-1079]	0	2439.01	Not Found	High	Not Found	Not Found	S1(Phosp): 51.14; S4(Phosp): 51.14; S7(Phosp): 48.57; T8(Phosp): 48.56		120000000			67.5	High	0	2.954e-05	S1058-S1061-S1064-T1065-T1067
	High	[R].SDVSDISTHTVTYGNIEGNAAK.[R]	1×PhosphoJoin [S4(92.2)]		4.15753e-07	0	1	1	4	Q01097	Q01097 [1058-1079]	0	2359.04	Not Found	High	Not Found	Not Found	S4(Phosp): 92.22		86000000			99.21	High	0	8.866e-08	S1061
	Medium	[K].ENSPHWEHVDLTDIYK.[E]	1×PhosphoJoin [S3(100)]		0.34711	0.0299724	1	1	1	Q01097	Q01097 [1141-1156]	0	2062.89	Not Found	Medium	Not Found	Not Found	S3(Phosp): 100		38000000			2.9	Medium	0.01288	0.1468	S1143
	Medium	[K].ERSDDFK.[R]	1×PhosphoJoin [S3(100)]		0.203484	0.0173463	1	1	1	Q01097	Q01097 [1157-1163]	1	976.377	High	Not Found	Not Found	Not Found	S3(Phosp): 100	36000000				14.03	High	0.007671	0.0844	S1159
	High	[K].RDSVSGGGPCTNR.[S]	1×Carbamidomethyl [C10]; 1×PhosphoJoin [S3(99.6)]		0.000105366	0	1	1	4	Q01097	Q01097 [1164-1176]	1	1442.58	High	High	Not Found	Not Found	S3(Phosp): 99.59	67000000	150000000			43.8	High	0	3.014e-05	S1166	2.23881
	High	[K].YPQSPTNSK.[A]	1×PhosphoJoin [S4(99.8)]		0.00374567	0.000521533	1	1	2	Q01097	Q01097 [1281-1289]	0	1101.46	High	High	Not Found	Not Found	S4(Phosp): 99.75	370000000	750000000			34.71	High	0.0002432	0.001917	S1284	2.02703
	High	[R].RQHSYDTFVDLQK.[E]	1×PhosphoJoin [S4(99.7)]		0.000160051	0	1	1	1	Q01097	Q01097 [1300-1312]	1	1716.77	Not Found	High	Not Found	Not Found	S4(Phosp): 99.7		43000000			32.04	High	0	4.709e-05	S1303
	High	[R].QHSYDTFVDLQK.[E]	1×PhosphoJoin [S/Y/T]		9.15788e-05	0	1	1	4	Q01097	Q01097 [1301-1312]	0	1560.67	High	High	Not Found	Not Found	S3(Phosp): 49.87; Y4(Phosp): 49.87	19000000	410000000			61.97	High	0	2.598e-05	S1303	21.5789
	High	[R].QHSYDTFVDLQK.[E]	2×PhosphoJoin [S3(100); Y4(100)]		0.000951752	0.000446946	1	1	1	Q01097	Q01097 [1301-1312]	0	1640.64	High	Not Found	Not Found	Not Found	S3(Phosp): 100; Y4(Phosp): 99.96	13000000				28.12	High	0.0001466	0.0003088	S1303-Y1304
	High	[R].QSVMNSPTATMNNTHSNILR.[L]	1×Oxidation [M11(100)]; 2×PhosphoJoin [S2(100); S6(97.8)]		2.369e-05	0	1	1	4	Q01097	Q01097 [881-900]	0	2391.98	High	High	Not Found	Not Found	S2(Phosp): 100; M4(Oxidation): 100; S6(Phosp): 99.93	9200000	180000000			67.59	High	0	6.237e-06	S882	19.5652
	High	[R].QSVMNSPTATMNNTHSNILR.[L]	2×PhosphoJoin [S2(100); S6(99.6)]		1.69211e-06	0	1	1	2	Q01097	Q01097 [881-900]	0	2375.99	Not Found	High	Not Found	Not Found	S2(Phosp): 100; S6(Phosp): 99.99		580000000			102.41	High	0	3.881e-07	S882-S886
	High	[R].QSVMNSPTATMNNTHSNILR.[L]	1×Oxidation [M4(100)]; 1×PhosphoJoin [S6(99.9)]		9.80766e-06	0	1	1	3	Q01097	Q01097 [881-900]	0	2312.02	Not Found	High	Not Found	Not Found	M4(Oxidation): 100; S6(Phosp): 99.86		74000000			42.73	High	0	2.468e-06	S886
	High	[R].QSVMNSPTATMNNTHSNILR.[L]	1×PhosphoJoin [S2(99.9)]		1.36709e-06	0	1	1	6	Q01097	Q01097 [881-900]	0	2296.02	Not Found	High	Not Found	Not Found	S6(Phosp): 99.99		16000000			88.75	High	0	3.102e-07	S886
	High	[R].QSVMNSPTATMNNTHSNILR.[L]	2×Oxidation [M4(100); M11(100)]; 1×PhosphoJoin [S2(100)]		0.000365093	0.000219061	1	1	2	Q01097	Q01097 [881-900]	0	2328.01	Not Found	High	Not Found	Not Found	M4(Oxidation): 100; S6(Phosp): 98.4; M11(Oxidation): 100					32.22	High	7.154e-05	0.0001138	S886
	High	[R].QSVMNSPTATMNNTHSNILR.[L]	3×PhosphoJoin [S2(99.9); S6(99.9); T10(89.6)]		0.00121558	0.000446946	1	1	2	Q01097	Q01097 [881-900]	0	2455.95	Not Found	High	Not Found	Not Found	S2(Phosp): 99.87; S6(Phosp): 99.87; T10(Phosp): 89.65		29000000			20.73	High	0.0001466	0.0004012	S882-S886-T890
	High	[K].NMANLSGVNGSPQSALDFIR.[R]	1×Oxidation [M2(100)]; 1×PhosphoJoin [S14(86.6)]		1.6805e-06	0	1	1	1	Q01097	Q01097 [907-926]	0	2186.99	Not Found	High	Not Found	Not Found	M2(Oxidation): 100; S14(Phosp): 86.64		11000000			64.37	High	0	3.859e-07	S920
	High	[K].NMANLSGVNGSPQSALDFIR.[R]	1×PhosphoJoin [S11(99.6)]		2.821e-08	0	1	1	2	Q01097	Q01097 [907-926]	0	2171	Not Found	High	Not Found	Not Found	S11(Phosp): 99.6		12000000			111.94	High	0	5.239e-09	S917
	High	[R].RESSVYDISEHR.[R]	2×PhosphoJoin [S3(100); S4(99.8)]		0.000505401	0.000219061	1	1	11	Q01097	Q01097 [927-938]	1	1637.64	High	High	Not Found	Not Found	S3(Phosp): 95.91; S4(Phosp): 95.91	87000000	77000000			37.14	High	0.0001466	0.0004994	S929-S930
	High	[R].RESSVYDISEHR.[R]	3×PhosphoJoin [S3(94.5); Y6(99.3); S]		0.0691173	0.00627109	1	1	1	Q01097	Q01097 [927-938]	1	1717.6	High	Not Found	Not Found	Not Found	S3(Phosp): 94.47; S4(Phosp): 53.14; Y6(Phosp): 99.26; S9(Phosp): 53.14					3.17	High	0.002587	0.02735	S929-S930-Y932-S935
	Medium	[R].RESSVYDISEHR.[R]	1×PhosphoJoin [Y/S]		0.183428	0.0158212	1	1	1	Q01097	Q01097 [927-938]	1	1557.67	Not Found	High	Not Found	Not Found	Y6(Phosp): 46.27; S9(Phosp): 46.27		2700000			10.6	High	0.006952	0.07613	Y932-S935
	High	[R].ESSVYDISEHR.[R]	1×PhosphoJoin [S2(94.5)]		6.97416e-05	0	1	1	6	Q01097	Q01097 [928-938]	0	1401.57	High	High	Not Found	Not Found	Y5(Phosp): 99.55	33000000	20000000			62.62	High	0	1.946e-05	Y932
	High	[R].ESSVYDISEHR.[R]	2×PhosphoJoin [Y5(100); S]		0.00384508	0.000521533	1	1	1	Q01097	Q01097 [928-938]	0	1481.53	High	Not Found	Not Found	Not Found	S2(Phosp): 50; S3(Phosp): 50; Y5(Phosp): 99.99	4400000				18.89	High	0.0002205	0.001328	S929-S930-Y932
	Medium	[R].ESSVYDISEHRR.[S]	2×PhosphoJoin [S8(98.7); S/Y]		0.149808	0.013264	1	1	2	Q01097	Q01097 [928-939]	1	1637.64	Not Found	High	Not Found	Not Found	S3(Phosp): 88.43; Y5(Phosp): 50.06; S8(Phosp): 50.06		8700000			18.47	High	0.005696	0.06175	S930-Y932-S935
	High	[R].SFTHSDCK.[S]	1×Carbamidomethyl [C7]; 1×PhosphoJoin [S1(100)]		0.00150092	0.000446946	1	1	2	Q01097	Q01097 [940-947]	0	1061.38	High	Medium	Not Found	Not Found	S1(Phosp): 99.99	230000000	630000000			34.29	High	0.0001466	0.0005004	S940	2.73913
	Medium	[R].SFTHSDCK.[S]	1×Carbamidomethyl [C7]; 2×PhosphoJoin [T3(90.9); S5(100)]		0.413922	0.0355587	1	1	2	Q01097	Q01097 [940-947]	0	1141.34	Medium	Not Found	Not Found	Not Found	T3(Phosp): 90.92; S5(Phosp): 99.97	62000000				7.37	Medium	0.01514	0.1803	T942-S944

## Sheet: P35438 (GluN1) Phosphopeptides
		IDENTIFIED GluN1 PHOSPHOSITES
GluN1
	Confidence	Annotated Sequence	Modifications	Modifications in Master Proteins	Qvality PEP	Qvality q-value	# Protein Groups	# Proteins	# PSMs	Master Protein Accessions	Positions in Master Proteins	# Missed Cleavages	Theo. MH+ [Da]	Found in Post EU	Found in Post TS	Found in Extra EU	Found in Extra TS	ptmRS: Best Site Probabilities	Areas Post EU	Areas Post TS	Areas Extra EU	Areas Extra TS	Ions Score Mascot	Confidence Mascot	Percolator q-Value Mascot	Percolator PEP Mascot		Ratio Post TS/EU	Phosphorylations in both experiments represented in Figure 6
Replicate 1	High	[R].AITSTLASSFK.[R]	1×PhosphoJoin [S9]		0.0163572	0.00121476	1	1	3	P35438	P35438 [882-892]	0	1205.58	Not Found	High	Not Found	Not Found	S9(Phosp): 93,72		6400000			25.53	High	0.004067	0.03354	S890
Replicate 2	High	[R].AITSTLASSFK.[R]	1×PhosphoJoin [S/T]		0.00927886	0.000521533	1	1	1	P35438	P35438 [882-892]	0	1205.58	Not Found	High	Not Found	Not Found	S8(Phosp): 49.99; S9(Phosp): 49.99		7500000			17.61	High	0.0002432	0.003301	S890

## Sheet: P23818 (GluA1) Phosphopeptides
		IDENTIFIED GluA1 PHOSPHOSITES
GluA1
	Confidence	Annotated Sequence	Modifications	Modifications in Master Proteins	Qvality PEP	Qvality q-value	# Protein Groups	# Proteins	# PSMs	Master Protein Accessions	Positions in Master Proteins	# Missed Cleavages	Theo. MH+ [Da]	Found in Post EU	Found in Post TS	Found in Extra EU	Found in Extra TS	ptmRS: Best Site Probabilities	Areas Post EU	Areas Post TS	Areas Extra EU	Areas Extra TS	Ions Score Mascot	Confidence Mascot	Percolator q-Value Mascot	Percolator PEP Mascot		Ratio Post TS/EU	Ratio Extra TS/EU	Phosphorylations in both experiments represented in Figure 6
	High	[K].GFCLIPQQSINEAIR.[T]	1×Carbamidomethyl [C3]; 1×PhosphoJoin [S9(100)]		0.00171202	0	1	1	5	P23818	P23818 [841-855]	0	1825.87	High	High	High	High	S9(Phosp): 100	16000000	24000000	4000000	24000000	31.85	High	0	0.0004333	S849
	High	[R].TSTLPR.[N]	1×PhosphoJoin [T3]		0.0353662	0.00209454	1	1	4	P23818	P23818 [856-861]	0	754.349	High	Not Found	Medium	Medium	T3(Phosp): 92,02	300000000		210000000	500000000	29.65	High	0.0007361	0.00549	T859	0	2.38095
	Confidence	Annotated Sequence	Modifications	Modifications in Master Proteins	Qvality PEP	Qvality q-value	# Protein Groups	# Proteins	# PSMs	Master Protein Accessions	Positions in Master Proteins	# Missed Cleavages	Theo. MH+ [Da]	Found in Post EU	Found in Post TS	Found in Extra EU	Found in Extra TS	ptmRS: Best Site Probabilities	Areas Post EU	Areas Post TS	Areas Extra EU	Areas Extra TS	Ions Score Mascot	Confidence Mascot	Percolator q-Value Mascot	Percolator PEP Mascot		Ratio Post TS/EU	Ratio Extra TS/EU	Phosphorylations in both experiments represented in Figure 6
	High	[R].FSPYEWHSEEFEEGR.[D]	1×PhosphoJoin [S8(98.1)]		0.103409	0.00930302	1	1	1	P23818	P23818 [560-574]	0	2008.77	Not Found	High	Not Found	Not Found	S8(Phosp): 98.14					3.52	High	0.003897	0.04199	S567
	High	[R].TSTLPR.[N]	1×PhosphoJoin [T3(92.6)]		0.0734784	0.00655857	1	1	5	P23818	P23818 [856-861]	0	754.349	High	High	High	High	T3(Phosp): 92.62	100000000	190000000	110000000	53000000	27.41	High	0.004282	0.04803	T859	1.9	0.481818
	High	[R].VVSQDFPK.[S]	1×PhosphoJoin [S3(100)]		0.0360878	0.00351292	1	1	2	P23818	P23818 [879-886]	0	999.455	High	High	Not Found	Not Found	S3(Phosp): 100	3800000	1400000			23.63	High	0.00151	0.01382	S881
